# Supplementary material
Source: HighWire-hosted journal article supplement (https://gh.bmj.com/content/9/1/e013245)
Supplement: inline-supplementary-material-4 [file inline-supplementary-material-4.pdf]

## S3 - Typology of words and phrases collected during the REA

| Word/Phrase                      | Occurrence | Working Definition                                                                                         | Language | Usage notes based on perceptions captured in interview and focus group data                                                                                                 | Likely or Unlikely Joint-Related? |
|----------------------------------|------------|------------------------------------------------------------------------------------------------------------|----------|-----------------------------------------------------------------------------------------------------------------------------------------------------------------------------|-----------------------------------|
| <i>Ugonjwa wa baridi</i>         | 11         | ' <i>Ugonjwa</i> ' meaning disease ' <i>wa baridi</i> ' meaning of cold                                    | Swahili  | The word is widely known and directly connected to joint pain. The word is used by and to refer to people who are suffering from joint pain, especially during cold season. | Likely                            |
| <i>Ugonjwa wa Uzee</i>           | 8          | ' <i>Ugonjwa</i> ' meaning disease ' <i>Uzee</i> ' meaning old age                                         | Swahili  | This word is common used by and about old people when speaking of joint pain.                                                                                               | Likely                            |
| <i>Maumivu ya mguu</i>           | 7          | ' <i>Maumivu</i> ' meaning pain ' <i>ya mguu</i> ' meaning of legs                                         | Swahili  | Formal language commonly used when there is joint pain or an injury relating to the leg(s).                                                                                 | Likely                            |
| <i>Nasikia maumivu ya viungo</i> | 5          | <i>Nasikia</i> ' meaning am feeling ' <i>maumivu</i> ' meaning pain ' <i>ya viungo</i> ' meaning of joints | Swahili  | The word is widely known and used to speak of joint pain.                                                                                                                   | Likely                            |
| <i>Magoti yanauma</i>            | 5          | ' <i>Magoti</i> ' meaning knee joints ' <i>yanauma</i> ' meaning pain                                      | Swahili  | This is the common word used to refer to joint pain in the knees.                                                                                                           | Likely                            |
| <i>Ugonjwa wa miguu</i>          | 4          | <i>Ugonjwa</i> ' meaning disease ' <i>wa miguu</i> ' meaning legs                                          | Swahili  | The word is commonly used to express pain in the legs.                                                                                                                      | Likely                            |
| <i>Ganzi</i>                     | 4          | ' <i>Ganzi</i> ' loss of sensation and pain, attributed to a specific part of the body                     | Swahili  | This is informal language, mostly used by younger people to describe loss of sensation and pain. The word can be used in relation to the joints.                            | Likely                            |
| <i>Viungo vyote vinauma</i>      | 4          | ' <i>Viungo</i> ' meaning joints ' <i>vyote</i> ' meaning all ' <i>vinauma</i> ' meaning pain.             | Swahili  | Formal language, commonly used when a person is experiencing pain in all of the joints, often associated with systemic conditions.                                          | Likely                            |
| <i>Tambazi au chango</i>         | 3          | ' <i>Tambazi</i> ' meaning ?abscess au ' <i>chango</i> ' meaning ?abscess                                  | Swahili  | Traditional known word in the community, used to express cause of pain or disease from the body.                                                                            | Unlikely                          |
| <i>Baridi yabisi</i>             | 3          | ' <i>Baridi</i> ' meaning cold ' <i>yabisi</i> ' meaning dry/hard                                          | Swahili  | Often used to in relation to 'cold disease' ( <i>ugonjwa wa baridi</i> ) to describe joints which are inflexible.                                                           | Likely                            |
| <i>Miguu inauma</i>              | 3          | ' <i>Miguu inauma</i> '                                                                                    | Swahili  | This is the common word used to express pains from the legs after walking a distance and get tired, the word is also connected to joint pain                                | Likely                            |

|                                           |   |                                                                                                                                              |         |                                                                                                                                                                                                  |          |
|-------------------------------------------|---|----------------------------------------------------------------------------------------------------------------------------------------------|---------|--------------------------------------------------------------------------------------------------------------------------------------------------------------------------------------------------|----------|
| <i>Mgongo umekata</i>                     | 3 | <i>Mgongo</i> meaning backbone ' <i>umekata</i> ' meaning pain                                                                               | Swahili | Informal language used to refer to back pain or backache.                                                                                                                                        | Likely   |
| <i>Kiuno kinakata</i>                     | 3 | ' <i>Kiuno</i> ' meaning waist ' <i>kinakata</i> ' meaning paining                                                                           | Swahili | The word is common used by ladies during menstrual period, to describe pain experienced around the waist. The word is also commonly used by and about those in older age to speak of joint pain. | Likely   |
| <i>Mshipa ya miguu imeshika</i>           | 3 | ' <i>Mshipa</i> ' meaning muscles ' <i>ya miguu</i> ' of the legs ' <i>imeshika</i> ' meaning lock/tighten                                   | Swahili | Informal language used when experiencing muscle cramps, also used by and about pregnant women when they experience muscle cramp.                                                                 | Unlikely |
| <i>Misuli inakamata</i>                   | 3 | ' <i>Misuli</i> ' meaning muscles ' <i>inakamata</i> ' meaning lock/tighten                                                                  | Swahili | Informal language used when experiencing muscle cramps, also used by and about pregnant women when they experience muscle cramp. Variation on <i>mshipa ya miguu imeshika</i> .                  | Unlikely |
| <i>Maumivu ya mgongo</i>                  | 2 | <i>Maumivu</i> ' meaning pain ' <i>ya mgongo</i> ' meaning backbone.                                                                         | Swahili | Commonly used by and to refer to men and women of all ages, specifically in relation to pain caused by doing heavy work, such as lifting heavy luggage. The word is used to speak of joint pain. | Likely   |
| <i>Najisikia kuchoka choka kama mlevi</i> | 2 | ' <i>Najisikia</i> ' meaning feeling ' <i>kuchoka choka</i> ' meaning tiredness ' <i>kama mlevi</i> ' meaning like a drinker (alcohol user). | Swahili | This is the common word used to express general body pain, often connected to a disease such as Malaria.                                                                                         | Unlikely |
| <i>Maumivu ndani ya mfupa</i>             | 2 | ' <i>Maumivu</i> ' meaning pains ' <i>ndani ya mfupa</i> ' meaning inside the bones.                                                         | Swahili | Informal language commonly used when a person is feeling pain relating to the bones. The word is used to speak of joint pain.                                                                    | Likely   |
| <i>Magoti kuvimba</i>                     | 2 | ' <i>Magoti</i> ' meaning knee ' <i>kuvimba</i> ' meaning swelling                                                                           | Swahili | This is common and known word used to speak of joint pain/arthritis                                                                                                                              | Likely   |
| <i>Maumivu ya mgongo</i>                  | 2 | <i>Maumivu</i> ' meaning pain ' <i>ya mgongo</i> ' meaning of back=Backache.                                                                 | Swahili | The word is common used when a person is having malaria, falling down, hard work, after delivery and old age. The condition is presented with the following symptoms such as legs                | Likely   |
| <i>Mkono, miguu umekufa ganzi</i>         | 2 | ' <i>Mkono</i> ' meaning hands ' <i>miguu</i> ' meaning legs ' <i>umekufa ganzi</i> ' meaning loss of sensation/feeling                      | Swahili | The word is common used when the hands and/or leg joints lose sensation, painfully.                                                                                                              | Unlikely |
| <i>Kuumwa na viungo</i>                   | 1 | ' <i>Kuumwa</i> ' meaning pain ' <i>na viungo</i> ' meaning joints                                                                           | Swahili | The word is commonly used and directly describes painful joints.                                                                                                                                 | Likely   |

|                                |   |                                                                                                                           |         |                                                                                                                                                                   |          |
|--------------------------------|---|---------------------------------------------------------------------------------------------------------------------------|---------|-------------------------------------------------------------------------------------------------------------------------------------------------------------------|----------|
| <i>Maumivu ya mikono</i>       | 1 | ' <i>Maumivu</i> ' meaning pain ' <i>ya mikono</i> ' meaning of hand                                                      | Swahili | This is the word used to explain hand pain associated with hard work. Often gendered to refer to women.                                                           | Likely   |
| <i>Mifupa kutoboa</i>          | 1 | <i>Mifupa</i> ' meaning bones ' <i>kutoboa</i> ' meaning aching                                                           | Swahili | The phrase is uncommon, but it is used to refer to joint pain.                                                                                                    | Likely   |
| <i>Miguu inawaka moto</i>      | 1 | <i>Miguu</i> ' meaning legs ' <i>inawaka moto</i> ' meaning feeling fire/pain                                             | Swahili | The phrase is uncommon, but it is used, especially with older people, to speak of joint pains in the leg.                                                         | Likely   |
| <i>Kuumwa na pingili</i>       | 1 | ' <i>Kuumwa</i> ' meaning feel sick ' <i>na pingili</i> ' meaning back bones                                              | Swahili | The phrase is uncommon. It is used to refer to back pain associated with malaria or meningitis.                                                                   | Likely   |
| <i>Kuumwa mifupa ya nyonga</i> | 1 | ' <i>Kuumwa</i> ' meaning feel sick ' <i>mifupa</i> ' meaning bones ' <i>ya nyonga</i> ' meaning bones in the groin/waist | Swahili | The phrase is commonly used by women during pregnancy.                                                                                                            | Unlikely |
| <i>Naumwa na uti wa mgongo</i> | 1 | <i>Naumwa</i> ' meaning am sick ' <i>na uti wa mgongo</i> ' meaning relating to spinal cord                               | Swahili | The phrase is uncommon. It is used to refer to back/joint pain when suffering from malaria.                                                                       | Likely   |
| <i>Ulemavu</i>                 | 1 | ' <i>Ulemavu</i> ' meaning disability                                                                                     | Swahili | This word is used to refer to a person who cannot work or cannot walk and is dependent on others for help.                                                        | Unlikely |
| <i>Najisikia vibaya</i>        | 1 | <i>Najisikia</i> ' meaning I am feeling ' <i>vibaya</i> ' meaning bad                                                     | Swahili | This phrase is commonly used to describe general feelings of illness and distress. This word is used to refer the bad feelings associated with joint pain.        | Unlikely |
| <i>Kiungo hakifanyi kazi</i>   | 1 | <i>Kiungo</i> ' meaning joint; ' <i>hakifanyi kazi</i> ' meaning does not work                                            | Swahili | This phrase is used is used to refer to joints which are not functioning, including painful joints. The phrase is not uncommon.                                   | Likely   |
| <i>Paralize</i>                | 1 | <i>Paralize</i> ' meaning paralysis                                                                                       | Swahili | The word is not common, but it is used when hands or legs are not moving properly. The word is also used in relation to joint pain.                               | Likely   |
| <i>Joint hakifanyi kazi</i>    | 1 | <i>Joint</i> ' meaning joint ' <i>hakifanyi kazi</i> ' meaning does not work/function                                     | Swahili | A common phrase used to describe a joint that is not functioning correctly, limiting movement. The phrase is also used in relation to joint pain.                 | Likely   |
| <i>Mguu umepigwa shoti</i>     | 1 | ' <i>Mguu</i> ' meaning legs ' <i>umepigwa</i> ' meaning have got ' <i>shoti</i> ' meaning spasms/cramps                  | Swahili | The phrase is commonly used to describe a person who is experiencing muscle spasm/cramps that prevent walking. The phrase is also used in relation to joint pain. | Unlikely |

|                                      |   |                                                                                             |         |                                                                                                                                                       |        |
|--------------------------------------|---|---------------------------------------------------------------------------------------------|---------|-------------------------------------------------------------------------------------------------------------------------------------------------------|--------|
| <i>Joint inashika</i>                | 1 | 'Joint' meaning joints 'inashika' meaning lock/tighting                                     | Swahili | Informal language, commonly used by and to refer to people whose joints are stiff/not functioning. The phrase is also used in relation to joint pain. | Likely |
| <i>Baridi imeingia kwenye viungo</i> | 1 | 'Baridi' meaning cold 'imeingia' meaning getting in 'kwenye viungo' meaning in the joints.  | Swahili | Informal language commonly used during the cold season by and to refer to people who experience joint pain.                                           | Likely |
| <i>Viungo kukamata</i>               | 1 | 'Viungo' meaning joints 'kukamata' meaning locking /tighting/pain                           | Swahili | Informal language, commonly used to describe joints which are stiff or locked and is associated with joint pain.                                      | Likely |
| <i>Joint za mikono zinauma</i>       | 1 | 'Joint' meaning joint 'za mikono' meaning of the hands 'zinauma' meaning are in pain.       | Swahili | A phrase widely used to describe painful joints in the hand.                                                                                          | Likely |
| <i>Naumwa ndani kwenye mifupa</i>    | 1 | 'Naumwa' meaning I am sick 'ndani' meaning inside 'kwenye mifupa' meaning of the bones      | Swahili | Informal language commonly used to speak of bone diseases and related joint pain                                                                      | Likely |
| <i>Mguu kushuka kwenye nyonga</i>    | 1 | 'Mguu' meaning legs 'kushuka' meaning tightening 'kwenye nyonga' meaning on the waist/groin | Swahili | The phrase is commonly used by women during pregnancy. It is also connected to joint pain. See also <i>kuumwa mifupa ya nyonga</i>                    | Likely |
| <i>Viungo vimechoka</i>              | 1 | 'Viungo' meaning joints 'vimechoka' meaning tired                                           | Swahili | This phrase is used to describe painful joints after significant exertion, such as lifting heavy items, climbing mountains or doing hard work.        | Likely |
| <i>Goti linavuta kwa ndani</i>       | 1 | 'Goti' meaning knee 'linavuta' meaning pulling 'kwa ndani' meaning inside                   | Swahili | This phrase is commonly used to describe pain relating to the knee.                                                                                   | Likely |
| <i>Kiungo kinavuta</i>               | 1 | 'Kiungo' meaning joint 'kinavuta' meaning pulling/pain                                      | Swahili | This phrase is used when a person experiences pain from the joints while walking. The word is commonly used to refer to joint pain.                   | Likely |
| <i>Miguu inapekecha</i>              | 1 | 'Miguu' meaning legs 'inapekecha' meaning pain/ache                                         | Swahili | This phrase is uncommon, but it is used to speak of joint pain relating to the legs                                                                   | Likely |
| <i>Nahisi vichomi</i>                | 1 | 'Nahisi' meaning am feeling 'vichomi' meaning burning pains                                 | Swahili | The phrase is used to refer to stomach-ache, chest pain, and joint pain. It is uncommon, but it is used to speak of burning pain in the body.         | Likely |

|                                   |   |                                                                                        |         |                                                                                                                                                                                                            |          |
|-----------------------------------|---|----------------------------------------------------------------------------------------|---------|------------------------------------------------------------------------------------------------------------------------------------------------------------------------------------------------------------|----------|
| <i>Uchovu wa viungo</i>           | 1 | 'Uchovu' meaning tiredness 'wa viungo' meaning of joints                               | Swahili | The phrase is commonly used to speak of joint pain, especially when one has malaria or has worked hard.                                                                                                    | Likely   |
| <i>Maradhi ya viungo</i>          | 1 | 'Maradhi' meaning illness/diseases 'ya viungo' meaning of joints                       | swahili | This phrase directly refers to pain and illness relating to the joints. The phrase is used by people who suffer from joint pain.                                                                           | Likely   |
| <i>Ukosefu wa vitamin mwilini</i> | 1 | 'Ukosefu wa' meaning lack of 'vitamin mwilini' meaning vitamins in the body            | Swahili | The phrase is common used when a child or a young person develops problems with their bones or joints, attributing this to the absence of certain vitamins.                                                | Likely   |
| <i>Nimeruka kitu kibaya</i>       | 1 | 'Nimeruka' meaning I have been jumped by 'kitu' meaning something 'kibaya' meaning bad | Swahili | This phrase describes being attacked by witchcraft and is commonly used when a problem, such as an illness or symptom does not go away. It can be used in relation to joint pain.                          | Likely   |
| <i>Maumivu ya kifua</i>           | 1 | <i>Maumivu'</i> meaning pain 'ya kifua' meaning of chest                               | Swahili | This phrase refers to chest pain caused by cigarette smoking, drinking alcohol, cold weather and allergies.                                                                                                | Unlikely |
| <i>Maumivu ya miguu</i>           | 1 | <i>Maumivu'</i> meaning pain 'ya miguu' of legs                                        | Swahili | This phrase is used to describe weakness in the legs associated with not eating well and old age. Symptoms include failure to stand and walk. The word is widely used and directly connected to joint pain | Likely   |
| <i>Maumivu ya kiuno</i>           | 1 | <i>Maumivu'</i> meaning pain 'ya kiuno' meaning waist                                  | Swahili | The phrase is used to describe a uterus infection or sexually transmitted diseases. Symptoms include failure to stand. The phrase is also widely used and connected to joint pain.                         | Unlikely |
| <i>Kichwa kinauma</i>             | 1 | 'Kichwa' meaning head 'kinauma' meaning pain                                           | Swahili | This phrase is common and is used when a person has a headache and can be associated with joint pain.                                                                                                      | Unlikely |
| <i>Ugonjwa wa presha</i>          | 1 | <i>Ugonjwa'</i> meaning disease 'wa presha' meaning of blood pressure                  | Swahili | This is an informal phrase, widely used in the community when a person has high blood pressure. It is also associated with joint pain.                                                                     | Unlikely |
| <i>Ugonjwa wa sukari</i>          | 1 | <i>ugonjwa'</i> meaning disease 'wa sukari' of diabetes                                | Swahili | This is an informal phrase, widely used in the community when a person has diabetes. It is also associated with joint pain.                                                                                | Unlikely |

|                              |   |                                                                                   |         |                                                                                                                                                                                                      |          |
|------------------------------|---|-----------------------------------------------------------------------------------|---------|------------------------------------------------------------------------------------------------------------------------------------------------------------------------------------------------------|----------|
| <i>Tambazi</i>               | 1 | <i>Tambazi</i> ' meaning oedema                                                   | Swahili | A common word associated with joint pain. The disease is caused by excess fluid trapped in the body tissues, which can affect the joints.                                                            | Unlikely |
| <i>Mikono kuwaka moto</i>    | 1 | <i>Mikono</i> ' meaning hand ' <i>kuwaka moto</i> ' meaning burning sensation     | Swahili | The phrase is common used to express nerve dysfunction in the hand due to nerve damage from an underlying condition. It is also associated with joint pain.                                          | Likely   |
| <i>Goti linavimba</i>        | 1 | ' <i>Goti</i> ' meaning knee ' <i>linavimba</i> ' meaning swelling/inflammation   | Swahili | This phrase is used to describe a swollen knee, with intermittent pain and a decreased range of motion.                                                                                              | Likely   |
| <i>Mguu kufa ganzi</i>       | 1 | ' <i>Mguu</i> ' meaning legs ' <i>kufa ganzi</i> ' meaning numbness               | Swahili | This phrase is commonly used to refer to when a person experiences numbness after sitting in a position for a long period. The word is also used when a person is experiencing difficult walking.    | Unlikely |
| <i>Maumivu ya magoti</i>     | 1 | <i>Maumivu</i> ' meaning pain ' <i>ya magoti</i> ' meaning knee joint             | Swahili | This phrase is commonly used to express pain around the knee. The phrase is also connected to a lack of nutrients or old age.                                                                        | Likely   |
| <i>Kifua kubana</i>          | 1 | <i>kifua</i> ' meaning chest ' <i>kubana</i> ' meaning tightness                  | Swahili | This phrase is commonly used when a person is having problem with the chest such as asthma, TB or if smoking. The phrase describes difficulty in breathing.                                          | Likely   |
| <i>Viungo kuwa na baridi</i> | 1 | <i>Viungo</i> ' meaning joints ' <i>kuwa na baridi</i> ' meaning have become cold | Swahili | This phrase is commonly used to describe pain in the joints, believed to be caused by the cooling of the joints. It is associated with joint pain that occurs during the cold season and in old age. | Likely   |
| <i>Miguu kuvimba</i>         | 1 | <i>Miguu</i> ' meaning legs ' <i>kuvimba</i> ' meaning swelling or inflammation   | Swahili | This phrase is commonly used when a person has swelling in their lower limbs due to disease such as kidney diseases. But it is also used to describe swollen joints caused by gout.                  | Likely   |

| <b>Word/Phrase</b>      | <b>Occurrence</b> | <b>Working Definition</b>                                                 | <b>Language</b> | <b>Usage notes based on perceptions captured in interview and focus group data</b>                                                                                                                                | <b>Likely or Unlikely Joint-Related?</b> |
|-------------------------|-------------------|---------------------------------------------------------------------------|-----------------|-------------------------------------------------------------------------------------------------------------------------------------------------------------------------------------------------------------------|------------------------------------------|
| <i>Ndwari ya mbeho</i>  | 3                 | <i>Ndwari</i> meaning disease ' <i>ya mbeho</i> ' meaning of cold         | Chagga          | This phrase is widely known and is directly connected to joint pain. The word is used by and to refer to people who are suffering from joint pain, especially during cold season.                                 | Likely                                   |
| <i>Nkewawio mungo</i>   | 3                 | <i>Nkewawio</i> meaning pain ' <i>mungo</i> ' meaning back bone           | Chagga          | This phrase is commonly used by older people to express backpain due to old age. The word is also used to explain back pain caused by falling down, cold conditions and hard work.                                | Likely                                   |
| <i>Shibario mahende</i> | 3                 | <i>Shibario</i> meaning pain ' <i>mahende</i> ' meaning legs              | Chagga          | This phrase is commonly used to describe pain and tiredness of the legs or discomfort in the legs. The phrase is associated with joint pain.                                                                      | Likely                                   |
| <i>Nkeparwa mahende</i> | 2                 | <i>Nkeparwa</i> meaning pain ' <i>marende</i> ' meaning legs              | Chagga          | This phrase is commonly used to describe pain and tiredness of the legs or discomfort in the legs. The phrase is associated with joint pain. See also <i>shibario mahende</i>                                     | Likely                                   |
| <i>Nkeparwa mungo</i>   | 2                 | <i>Nkeparwa</i> meaning pain ' <i>mungo</i> ' meaning backbone            | Chagga          | This phrase is commonly used to describe pain and discomfort in the back. The phrase is associated with joint pain.                                                                                               | Likely                                   |
| <i>Ugonjwa wa mbeho</i> | 2                 | <i>Ugonjwa</i> meaning disease ' <i>wa mbeho</i> ' meaning of cold        | Chagga          | This phrase is widely known and is directly connected to joint pain. The word is used by and to refer to people who are suffering from joint pain, especially during cold season. See also <i>ndwari ya mbeho</i> | Likely                                   |
| <i>Nshikewawio ndii</i> | 2                 | <i>Nshikewawio</i> meaning having pain ' <i>ndii</i> ' meaning knee joint | Chagga          | This phrase is commonly used to describe pain or swelling on the knee. The phrase is associated with joint pain.                                                                                                  | Likely                                   |

|                               |   |                                                                                   |        |                                                                                                                                                                                                                       |        |
|-------------------------------|---|-----------------------------------------------------------------------------------|--------|-----------------------------------------------------------------------------------------------------------------------------------------------------------------------------------------------------------------------|--------|
| <i>Madendee yakewawia</i>     | 2 | 'Madendee' meaning legs 'yakewawia' meaning pains                                 | Chagga | This phrase is commonly used to describe pain in the legs. The phrase is associated with joint pain.                                                                                                                  | Likely |
| <i>Mungo keshiwaia</i>        | 2 | <i>Mungo</i> ' meaning back bone ' <i>keshiwaia</i> ' meaning pain                | Chagga | The phrase is commonly used to express back pain caused by falling down, hard work or old age.                                                                                                                        | Likely |
| <i>Wakiwawio mahende</i>      | 2 | <i>Wakiwawio</i> ' meanin pain ' <i>mahende</i> ' meaning legs                    | Chagga | The phrase is used to describe physical discomfort in part or all of the leg, or joint weakness, or burning sensation and or leg cramps. This phrase is not widely known, but it is directly connected to joint pain. | Likely |
| <i>Nkebario maoko</i>         | 2 | ' <i>Nkebario</i> ' meaning pain ' <i>maoko</i> ' meaning hands                   | Chagga | This phrase is commonly used by and to refer to those (mostly women) who experience pain in the hands associated with over work. The word is directly connected to joint pain.                                        | Likely |
| <i>Nkeparwa maoko</i>         | 1 | ' <i>Nkeparwa</i> ' meaning pain ' <i>maoko</i> ' meaning hands                   | Chagga | This phrase is commonly used to refer to those who experience pain in the hands. The word is directly connected to joint pain.                                                                                        | Likely |
| <i>Maoko akewawa deny</i>     | 1 | ' <i>Maoko</i> ' meaning hands ' <i>akewawa deny</i> ' meaning having severe pain | Chagga | This phrase is commonly used to refer to those who experience severe pain in the hands after hard work. The word is directly connected to joint pain.                                                                 | Likely |
| <i>Mungo washiwawia denyi</i> | 1 | <i>Mungo</i> ' meaning back bone ' <i>washiwawia denyi</i> ' meaning severe pain  | Chagga | The phrase is commonly used to express severe back pain caused by bending down often, hard work or bearing a large number of children.                                                                                | Likely |
| <i>Malungo yakewawa</i>       | 1 | ' <i>Malungo</i> ' meaning joints ' <i>Yakewawa</i> ' meaning pain                | Chagga | This phrase is commonly used to refer directly to pain in the joints.                                                                                                                                                 | Likely |
| <i>Shikewawio marende</i>     | 1 | <i>Shikewawio</i> ' meaning I am sick ' <i>Marende</i> ' meaning legs             | Chagga | This phrase is used by Chagga people from the Massama area to describe painful legs, particularly related to fatigue.                                                                                                 | Likely |



|                                  |   |                                                                                   |        |                                                                                                                                                                                                                                                                                                                                   |        |
|----------------------------------|---|-----------------------------------------------------------------------------------|--------|-----------------------------------------------------------------------------------------------------------------------------------------------------------------------------------------------------------------------------------------------------------------------------------------------------------------------------------|--------|
| <i>Viungo vyako vikewawa</i>     | 1 | <i>Viungo vyako'</i> meaning my joints; <i>'vikewawa'</i> meaning pain            | Chagga | This phrase is commonly used to refer directly to joint pain when a person is tired from work or when they have malaria.                                                                                                                                                                                                          | Likely |
| <i>Marende yakeshibaria deni</i> | 1 | <i>'Marende'</i> meaning legs <i>'yakeshibaria deni'</i> meaning in a lot of pain | Chagga | This phrase is commonly used to refer to severe leg pains. The phrase is often specifically applied to problems with the leg bones.                                                                                                                                                                                               | Likely |
| <i>Mawina</i>                    | 1 | <i>mawina'</i> meaning joints pain                                                | Chagga | The word is used to refer to recurring joint pain, especially during cold season. Also it is commonly used when a person experiences joint pain caused by previous accidents, again during the cold season. It is also commonly used by and to refer to older people who experience joint pain, especially during cold season.    | Likely |
| <i>Mbeyo</i>                     | 1 | <i>'Mbeyo'</i> meaning pain in the shoulder                                       | Chagga | The word refers to pain in the shoulder, particularly related to the cold. It is not widely used                                                                                                                                                                                                                                  | Likely |
| <i>Ndwali Nkuluwe</i>            | 1 | <i>Ndwali'</i> meaning any joint pain <i>'Nkuluwe'</i> meaning any joint pain     | Chagga | These words are used interchangeably to express pain in the joints. They are often used specifically to describe the inflammation of joints or gout.                                                                                                                                                                              | Likely |
| <i>Mahende akewawa mdo</i>       | 1 | <i>Mahende'</i> meaning legs <i>'akewawa mdo'</i> meaning burning sensation       | Chagga | This phrase is used to express burning sensations in the legs which is associated with the cold season and is said to be common among older people.                                                                                                                                                                               | Likely |
| <i>Mungo kewawa</i>              | 1 | <i>Mungo'</i> meaning backbone <i>'kewawa'</i> meaning pain.                      | Chagga | The word is common known by Chagga people and used when a person is having malaria or falling down or hard work or after delivery and is mostly common expressed by old people with symptoms of legs weakness, fever condition. And This phrase is well known and used to describe joint pain that occurs during the cold season. | Likely |
| <i>Ndori ambio</i>               | 1 | <i>Ndori'</i> meaning disease <i>'ambio'</i> meaning cold                         | Chagga | This phrase is well known and used to describe joint pain that occurs during the cold season. The word is also used to express pain specifically in the hands, waist and shoulders.                                                                                                                                               | Likely |

|                         |   |                                                                      |        |                                                                                                                                                                                                                                                                                             |        |
|-------------------------|---|----------------------------------------------------------------------|--------|---------------------------------------------------------------------------------------------------------------------------------------------------------------------------------------------------------------------------------------------------------------------------------------------|--------|
| <i>Ndi kikeshiwaia</i>  | 1 | <i>Ndi</i> ' meaning legs ' <i>kikeshiwaia</i> ' meaning pain        | Chagga | This phrase is used to to express discomfort in part or all of the leg including weakness, burning sensations and cramps. The word is not widely known, but it is assoicated with joint pain.                                                                                               | Likely |
| <i>Shikewawiode</i>     | 1 | <i>Shikewawiode</i> ' meaning joint pain                             | Chagga | This phrase is used to refer to any pain in the joints, such as hands, knees, waist. It is not widely used. However, it is directly connected to joint pain.                                                                                                                                | Likely |
| <i>Maako akewawa</i>    | 1 | <i>Maako</i> ' meaning hands ' <i>akewawa</i> ' meaning pain         | Chagga | This phrase is used to describe tenderness, swelling and stiffness relating to the hands and fingers. It is not widely known, but it is directly connected to joint pain. See also <i>Maako akewawa deny</i>                                                                                | Likely |
| <i>Nukewawa</i>         | 1 | <i>Nukewawa</i> ' meaning finger pain.                               | Chagga | This word is used to describe the loss of joint mobility in the fingers which impacts everyday activities. The word is not widely known but is directly connected to joint pain                                                                                                             | Likely |
| <i>Wakiwio mungo</i>    | 1 | <i>Wakiwio</i> ' meaning pain ' <i>mungo</i> ' back bone             | Chagga | This phrase is used to describe back pain caused by malaria, falling down, hard work or walking long distances. it is particularly applied to older people in whom it is associated with legs weakness and fevers. The word is not widely known but it is directly connected to joint pain. | Likely |
| <i>Wakiwawio magoti</i> | 1 | <i>Wakiwawio</i> ' meaning pain ' <i>magoti</i> ' meaning knee joint | Chagga | This phrase is used to describe oain in or around the knee. The word is also used when a person is having difficults sitting or is experiencing sore joints. The phrase is not widely known but is directly connected to joint pain.                                                        | Likely |

|                          |   |                                                                            |        |                                                                                                                                                                                                                                    |        |
|--------------------------|---|----------------------------------------------------------------------------|--------|------------------------------------------------------------------------------------------------------------------------------------------------------------------------------------------------------------------------------------|--------|
| <i>Mungo kebara</i>      | 1 | <i>Mungo'</i> meaning back bone ' <i>kebara</i> ' meaning pain             | Chagga | This phrase is used used when a person experiences backache after doing hard work. The word is directly related to joint pain                                                                                                      | Likely |
| <i>Nkewawio malungo</i>  | 1 | <i>Nkewawio'</i> meaning pain ' <i>malungo</i> ' meaning joints            | Chagga | This phrase is commonly used to refer to any pain in the joints, such as hands, knees, waist. It is directly connected to joint pain.                                                                                              | Likely |
| <i>Shite mbeyo</i>       | 1 | <i>Shite'</i> meaning feeling ' <i>mbeyo</i> ' meaning cold                | Chagga | This phrase is commonly used during cold season to describe discomfort associated with the cold. It is widely used by and to refer to people who are suffering from joint pain. The phrase is directly associated with joint pain. | Likely |
| <i>Maoko alemakaside</i> | 1 | <i>'Maoko'</i> meaning hands ' <i>alemakasidenyi</i> ' meaning severe pain | Chagga | This phrase describes severe hand pains often connected to accidents or cold conditions. The word is most used by older people to speak of joint pain.                                                                             | Likely |

| Word/Phrase           | Occurrence | Working Definition                                            | Language | Usage notes based on perceptions captured in interview and focus group data                                                                                                                                           | Likely or Unlikely Joint-Related? |
|-----------------------|------------|---------------------------------------------------------------|----------|-----------------------------------------------------------------------------------------------------------------------------------------------------------------------------------------------------------------------|-----------------------------------|
| <i>Faditilia</i>      | 1          | ' <i>Faditilia</i> ' meaning any joint pain.                  | Iraq     | This word is commonly used to express any joint pain, but often in relation to the hands, waist, legs or gout. The word is not widely known, but it is directly connected to joint pain.                              | Likely                            |
| <i>Sagiktili Saga</i> | 1          | <i>Sagiktili</i> ' meaning pain ' <i>Saga</i> ' meaning head  | Iraq     | A commonly used phrase describing headaches. The word is also used to refer to joint pain in the head e.g. neck                                                                                                       | Unlikely                          |
| <i>Uratili</i>        | 1          | <i>Ura</i> ' meaning stomach ' <i>tili</i> ' meaning pain     | Iraq     | This word is used to express pain from inside the stomach. The word is also used when a person has a muscle strain or constipation. The word is not widely used. However, it is not directly connected to joint pain. | Unlikely                          |
| <i>Yahtili</i>        | 1          | <i>Yah</i> ' meaning leg ' <i>tili</i> ' meaning pain         | Iraq     | This word is used to describe physical discomfort in the legs with symptoms of lower limb weakness, burning sensations and cramps. The word is not widely known, but is used to speak of joint pain.                  | Likely                            |
| <i>Dabatili</i>       | 1          | <i>Dab</i> ' meaning hands ' <i>atili</i> ' meaning pain      | Iraq     | This word is used to describe pain in the hands, including stiffness and swelling. The word is widely known and is used to speak of joint pain.                                                                       | Likely                            |
| <i>Dandatili</i>      | 1          | <i>Danda</i> ' meaning back bone ' <i>tili</i> ' meaning pain | Iraq     | This word is used to describe backache caused by falling down, injury or hard work. The word is often used by older people, but is not widely known. It is directly connected to joint pain.                          | Likely                            |
| <i>Yah tahamae</i>    | 1          | ' <i>Yah</i> ' meaning legs ' <i>tahamae</i> ' meaning pain   | Iraq     | This phrase is commonly used word to describe leg pain including weakness, burning sensation and cramps. The word is common and direct connected to arthritis. See also, <i>yahtili</i>                               | Likely                            |

| Word/Phrase     | Occurrence | Working Definition                     | Language | Usage notes based on perceptions captured in interview and focus group data                                                                                                                                                       | Likely or Unlikely Joint-Related? |
|-----------------|------------|----------------------------------------|----------|-----------------------------------------------------------------------------------------------------------------------------------------------------------------------------------------------------------------------------------|-----------------------------------|
| <i>Ongorio</i>  | 1          | <i>Ongorio'</i> meaning backache.      | Maasai   | This word is commonly used to describe backache relating to malaria, falling down/injury, hard work, after giving birth and old age. The word is widely used and refers directly to joint pain.                                   | Likely                            |
| <i>Embolosi</i> | 1          | <i>Embolosi'</i> meaning waist pain.   | Maasai   | This word is commonly used to describe pain in the waist caused by hard work, old age and cold conditions. The word is widely used and refers directly to joint pain.                                                             | Likely                            |
| <i>Ngaeki</i>   | 1          | <i>Ngaeki'</i> meaning hand pain.      | Maasai   | This word is commonly used to describe pain in the hands. The word is widely used and refers directly to joint pain.                                                                                                              | Likely                            |
| <i>Ngaejeki</i> | 1          | <i>Ngaejeki'</i> meaning leg pain.     | Maasai   | This word is commonly used to describe pain in the leg caused by weakness from not eating well/old age/hard work. It casuses problems with standing and walking.The word is used to refer to joint pain.                          | Likely                            |
| <i>Elokonya</i> | 1          | <i>'Elokonya'</i> meaning headache.    | Maasai   | This word is commonly used to describe pains in the head, which are sharp or dull. The word also is sometimes associated with joint pain.                                                                                         | Unlikely                          |
| <i>Engohoke</i> | 1          | <i>Engohoke'</i> meaning stomach ache. | Maasai   | This word is commonly used to describe pain in the stomach, ranging from mild and temporary to severe. It is also includes muscle strain and constipation. The word is not widely known and not directly connected to joint pain. | Unlikely                          |

| Word/Phrase                | Occurrence | Working Definition                                                                       | Language | Usage notes based on perceptions captured in interview and focus group data                                                                                                                                                                                       | Likely or Unlikely Joint-Related? |
|----------------------------|------------|------------------------------------------------------------------------------------------|----------|-------------------------------------------------------------------------------------------------------------------------------------------------------------------------------------------------------------------------------------------------------------------|-----------------------------------|
| <i>Naumiwa</i>             | 1          | <i>Naumiwa'</i> meaning I am sick                                                        | Sambaa   | This word is used to speak of general sickness, including joint pain. It is connected to joint pain                                                                                                                                                               | Unlikely                          |
| <i>Mavuha ya gwii</i>      | 1          | <i>Mavuha'</i> meaning bones ' <i>ya gwii'</i> meaning mine                              | Sambaa   | This phrase is commonly used to refer to bone pain or bone disease. The phrase can also be used after hard work or to describe a fracture or bone-related injury.                                                                                                 | Likely                            |
| <i>Mihundi</i>             | 1          | <i>Mihundi'</i> meaning legs pain.                                                       | Sambaa   | This word is common used to express physical discomfort in the legs, characterized by weakness, burning sensations and cramps. The word is directly connected to joint pain                                                                                       | Likely                            |
| <i>Miguu yaniuma</i>       | 1          | <i>Miguu'</i> meaning legs ' <i>yaniuma'</i> meaning pain                                | Sambaa   | This word is commonly used to describe leg pains relating to hard work, such as walking long distances or doing significant farm work. The word is also used when a person is sick and experiences pain in the legs. The word is directly connected to joint pain | Likely                            |
| <i>Mwili washe waniuma</i> | 1          | <i>Mwili'</i> meaning body ' <i>woshe'</i> meaning whole ' <i>waniuma'</i> meaning pain. | Sambaa   | This phrase is commonly used when a person is sick, has suffered injury from a fall, experiences pain from working hard or pain from exposure to cold conditions. The word also is used to speak of joint pain.                                                   | Unlikely                          |

| Word/Phrase                       | Occurrence | Working Definition                                                                                   | Language | Usage notes based on perceptions captured in interview and focus group data                                                                                                                                                                                        | Likely or Unlikely Joint-Related? |
|-----------------------------------|------------|------------------------------------------------------------------------------------------------------|----------|--------------------------------------------------------------------------------------------------------------------------------------------------------------------------------------------------------------------------------------------------------------------|-----------------------------------|
| <i>Natamwa</i>                    | 1          | ' <i>Natamwa</i> ' meaning any joint pain.                                                           | Gogo     | This word is commonly used to express any type of joint pain including in the hands, waist, back and legs. The word is directly connected to joint pain.                                                                                                           | Likely                            |
| <i>Migulu ifugamilo</i>           | 1          | <i>Migulu</i> ' meaning knee joint ' <i>ifugamilo</i> ' meaning pain                                 | Gogo     | This phrase is used to express pain in or around the knee which. The word is also used when a person experiences pain from sitting on knees for a prolonged period or when the knee is swollen. The word is widely known, but is directly connected to joint pain. | Likely                            |
| <i>Ukutamwa namgati nakuvimba</i> | 1          | <i>Ukutamwa</i> ' meaning pain ' <i>namgati</i> ' meaning knee ' <i>nakuvimba</i> ' meaning swelling | Gogo     | This phrase is used to express pain in the knee joints. It is also used to describe a swollen knee, intermittent pain and decreased range of motion. The word is not widely known, but directly connected to joint pain.                                           | Likely                            |
| <i>Namtwe ukubwanhola</i>         | 1          | <i>Namtwe</i> ' meaning ' <i>ukubwanhola</i> ' meaning hea                                           | Gogo     | This phrase is used when a person is suffering from a headache. The informant also express that, the word is also used to speak to joint pain.                                                                                                                     | Unlikely                          |

| Word/Phrase            | Occurrence | Working Definition                                           | Language | Usage notes based on perceptions captured in interview and focus group data                                                                            | Likely or Unlikely Joint-Related? |
|------------------------|------------|--------------------------------------------------------------|----------|--------------------------------------------------------------------------------------------------------------------------------------------------------|-----------------------------------|
| <i>Nolumwa mafindi</i> | 1          | 'Nolumwa' meaning am feeling sick<br>'mafindi' meaning waist | Kwere    | The phrase is commonly used to speak of waist pain. The pain can be associated with work or diseases. The word is sometimes connected to joint pain    | Unlikely                          |
| <i>Nolumwa mayot</i>   | 1          | Nolumwa' meaning feeling sick<br>'mayot' meaning knee joint  | Kwere    | The phrase is commonly used to describe pain or discomfort in the knee joins. The word is directly connected to joint pain                             | Likely                            |
| <i>Vyoluma milono</i>  | 1          | 'vyoluma' meaning pain 'milono'<br>meaning wrist joint       | Kwere    | The phrase is commonly used to describe pain in the wrist. This can be attributed to fracture or disease. The word is directly connected to joint pain | Likely                            |



| Word/Phrase      | Occurrence | Working Definition                                                              | Language | Usage notes based on perceptions captured in interview and focus group data                                                                                                                                                                                                                                                                             | Likely or Unlikely Joint-Related? |
|------------------|------------|---------------------------------------------------------------------------------|----------|---------------------------------------------------------------------------------------------------------------------------------------------------------------------------------------------------------------------------------------------------------------------------------------------------------------------------------------------------------|-----------------------------------|
| <i>Rimatizim</i> | 6          | Rheumatism                                                                      | English  | This word is a localisation of the English word 'rheumatism' and is used to describe stiff and sore joints. The word is directly connected to joint pain and it is widely used.                                                                                                                                                                         | Likely                            |
| <i>Gauti</i>     | 5          | ' <i>Gauti</i> ' meaning disease of the lower limbs, especially the knee joints | English  | This word is a localisation of the English word 'gout'. The word is widely know in the urban area, but less so in the rural area. 'Gauti' is associated with eating goat meat and with alcohol (beer). Other people associated the condition with dryness of the joints fluids especially the knee joints. The word is directly connected to joint pain | Likely                            |
| <i>Malaria</i>   | 1          | ' <i>Malaria</i> ' meaning parasitic infection with plasmodium                  | English  | This is the word commonly used to describe confirmed malaria. But is also used to speak of joint pain when malaria has not been confirmed.                                                                                                                                                                                                              | Unlikely                          |

| Word/Phrase              | Working Definition                                                       | Language | Usage notes based on perceptions captured in interview and focus group data                                                                                                                                              | Likely or Unlikely Joint-Related? |
|--------------------------|--------------------------------------------------------------------------|----------|--------------------------------------------------------------------------------------------------------------------------------------------------------------------------------------------------------------------------|-----------------------------------|
| <i>Muhongo kukukusha</i> | <i>Muhongo</i> ' meaning back bone<br><i>'kukukusha'</i> meaning shaking | Pare     | This phrase is commonly used to describe backache and is associated with shaking or spasms. The condition can be associated with condition such as malaria, or high fever. The word is also used to refer to joint pain. | Unlikely                          |
| <i>Vivaju</i>            | <i>Vivaju</i> ' meaning rib pain.                                        | Pare     | This word is commonly used to describe injury below the chest, including both dull and sharp pain. The word is not widely known but is indirectly connected to joint pain.                                               | Unlikely                          |

| Word/Phrase                   | Working Definition                                             | Language | Usage notes based on perceptions captured in interview and focus group data                                                       | Likely or Unlikely Joint-Related? |
|-------------------------------|----------------------------------------------------------------|----------|-----------------------------------------------------------------------------------------------------------------------------------|-----------------------------------|
| <i>Muviri wakatire sana</i>   | 'Muviri' meaning body 'wakatire sana' meaning lots of pain     | Rangi    | This phrase is commonly used to describe body pain, such as when having fever due to malaria. It is also connected to joint pain. | Unlikely                          |
| <i>Nukitera wakatire sana</i> | 'Nukitera' meaning joints 'wakatiri sana' meaning lots of pain | Rangi    | This phrase is commonly used to describe severe joint pain. It is directly connected to joint pain.                               | Likely                            |
